# Supplementary material
Source: PubMed Central journal article supplement (PMC2801778)
Supplement: NIHMS159725-supplement-1_si_001.pdf [file NIHMS159725-supplement-1_si_001.pdf]

# Supporting Information for:

**Probing the metabolic aberrations underlying mutant huntingtin toxicity in yeast and assessing their degree of preservation in humans and mice.**

**P. Matthew Joyner,<sup>†</sup> Ronni M. Matheke,<sup>†</sup> Lindsey M. Smith,<sup>†</sup> and Robert H. Cichewicz<sup>\*,†,‡</sup>**

<sup>†</sup>*Natural Products Discovery Group, Department of Chemistry and Biochemistry, 620 Parrington Oval, Room 208, University of Oklahoma, Norman, Oklahoma, 73019-3032, USA.*

<sup>‡</sup>*Cellular and Behavioral Neurobiology Graduate Program, University of Oklahoma, Norman, Oklahoma, 73019-3032, USA.*

\*To whom correspondence should be addressed. Tel: (405) 325-6969; Fax: (405) 325-6111; E-mail: rhcichewicz@ou.edu

## INDEX FOR SUPPORTING INFORMATION

|                                              |           |
|----------------------------------------------|-----------|
| <b>Supporting Information, Figure 1.....</b> | <b>2</b>  |
| <b>Supporting Information, Table 1.....</b>  | <b>3</b>  |
| <b>Supporting Information, Methods.....</b>  | <b>8</b>  |
| <b>Supporting Information, Figure 2.....</b> | <b>8</b>  |
| <b>Supporting Information, Table 2.....</b>  | <b>9</b>  |
| <b>Supporting Information, Table 3.....</b>  | <b>11</b> |
| <b>References.....</b>                       | <b>12</b> |

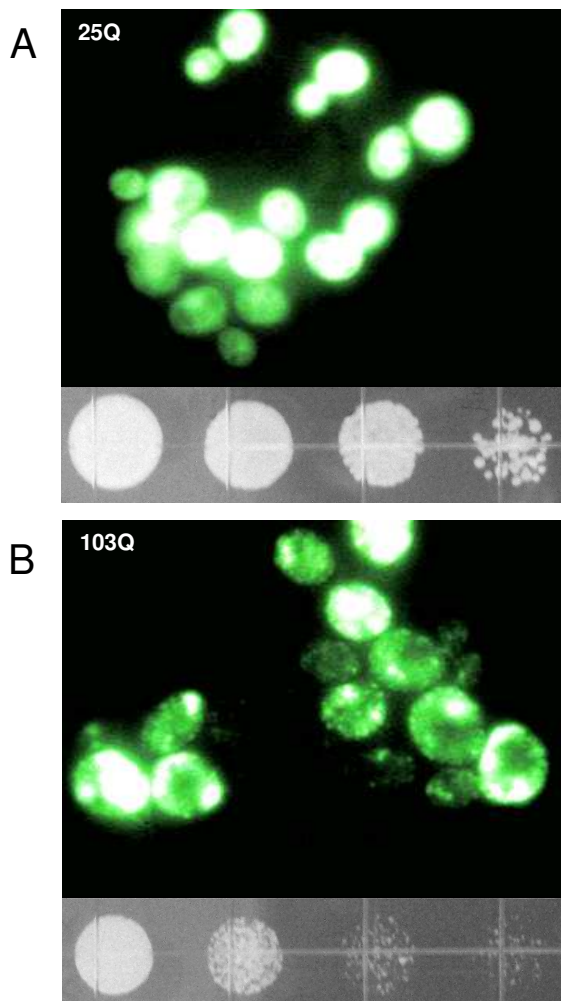

**Supporting Information Figure 1** False-color fluorescent microscopy images of yeast cells expressing human *Htt* fragments. A) Yeast expressing *Htt* fragment with 25 glutamine repeats. B) Yeast expressing m*Htt* fragment with 103 glutamine repeats. Spot cultures (A, lower panel; B, lower panel) show a significant decrease in cell viability due to mutant huntingtin toxicity.

**Supporting Information, Table 1** Structures of Metabolites with  $^1\text{H}$  NMR Chemical Shifts and Multiplicities

| Metabolite             | Structure with $^1\text{H}$ NMR Chemical Shifts and Multiplicities                                                                                                                                                                                                             |
|------------------------|--------------------------------------------------------------------------------------------------------------------------------------------------------------------------------------------------------------------------------------------------------------------------------|
| 4-aminobutyrate        | <p>Chemical structure of 4-aminobutyrate with <math>^1\text{H}</math> NMR data: 1.89, m (CH<sub>2</sub>), 2.28, t (CH<sub>2</sub>), 3.00, t (CH<sub>2</sub>).</p>                                                                                                              |
| acetate                | <p>Chemical structure of acetate with <math>^1\text{H}</math> NMR data: 1.91, s (CH<sub>3</sub>).</p>                                                                                                                                                                          |
| adenosine              | <p>Chemical structure of adenosine with <math>^1\text{H}</math> NMR data: 8.34, s (H<sub>8</sub>), 8.22, s (H<sub>6</sub>), 4.28, q (H<sub>2'</sub>), 4.44, dd (H<sub>3'</sub>), 6.02, d (H<sub>1'</sub>).</p>                                                                 |
| adenosine triphosphate | <p>Chemical structure of adenosine triphosphate with <math>^1\text{H}</math> NMR data: 8.24, s (H<sub>8</sub>), 8.53, s (H<sub>6</sub>), 4.21, m (CH<sub>2</sub>), 4.28, m (H<sub>2'</sub>), 4.39, m (H<sub>3'</sub>), 4.51, m (H<sub>4'</sub>), 4.62, t (H<sub>1'</sub>).</p> |
| alanine                | <p>Chemical structure of alanine with <math>^1\text{H}</math> NMR data: 3.76, q (CH), 1.46, d (CH<sub>3</sub>).</p>                                                                                                                                                            |
| arginine               | <p>Chemical structure of arginine with <math>^1\text{H}</math> NMR data: 3.75, t (CH), 1.89, dd (CH<sub>2</sub>), 3.23, t (CH<sub>2</sub>), 1.64, m (CH<sub>2</sub>), 1.72, m (CH<sub>2</sub>).</p>                                                                            |

**Supporting Information, Table 1** Structures of Metabolites with  $^1\text{H}$  NMR Chemical Shifts and Multiplicities (continued from page 3)

| Metabolite  | Structure with $^1\text{H}$ NMR Chemical Shifts and Multiplicities |
|-------------|--------------------------------------------------------------------|
| asparagine  |                                                                    |
| aspartate   |                                                                    |
| formate     |                                                                    |
| galactitol  |                                                                    |
| galactose   |                                                                    |
| glutamate   |                                                                    |
| glutamine   |                                                                    |
| glutathione |                                                                    |

**Supporting Information, Table 1** Structures of Metabolites with  $^1\text{H}$  NMR Chemical Shifts and Multiplicities (continued from page 4)

| Metabolite                                   | Structure with $^1\text{H}$ NMR Chemical Shifts and Multiplicities                                  |
|----------------------------------------------|-----------------------------------------------------------------------------------------------------|
| glycerol                                     | <p>3.55, m<br/>3.64, m<br/>3.77, tt<br/>3.55, m<br/>3.64, m</p>                                     |
| histidine                                    | <p>3.16, dd<br/>3.23, dd<br/>3.98, dd<br/>7.09, s<br/>7.90, s</p>                                   |
| isoleucine                                   | <p>1.00, d<br/>1.24, m<br/>1.46, m<br/>0.93, t<br/>3.66, d<br/>1.97, m</p>                          |
| leucine                                      | <p>0.95, d<br/>1.70, m<br/>0.94, d<br/>3.73, m<br/>1.70, m</p>                                      |
| methionine                                   | <p>2.15, m<br/>3.85, m<br/>2.15, m<br/>2.63, t</p>                                                  |
| Nicotinamide adenine dinucleotide (oxidized) | <p>8.16, s<br/>8.42, s<br/>6.02, d<br/>8.18, dd<br/>8.82, d<br/>9.14, d<br/>9.32, s<br/>6.07, d</p> |

**Supporting Information, Table 1** Structures of Metabolites with  $^1\text{H}$  NMR Chemical Shifts and Multiplicities (continued from page 5)

| Metabolite       | Structure with $^1\text{H}$ NMR Chemical Shifts and Multiplicities |
|------------------|--------------------------------------------------------------------|
| phenylalanine    |                                                                    |
| proline          |                                                                    |
| propylene glycol |                                                                    |
| succinate        |                                                                    |
| threonine        |                                                                    |
| trehalose        |                                                                    |
| tryptophan       |                                                                    |

**Supporting Information, Table 1** Structures of Metabolites with  $^1\text{H}$  NMR Chemical Shifts and Multiplicities (continued from page 6)

| Metabolite | Structure with $^1\text{H}$ NMR Chemical Shifts and Multiplicities |
|------------|--------------------------------------------------------------------|
| tyrosine   |                                                                    |
| valine     |                                                                    |

## Supporting Information, Methods

### Metabolomic analysis of potassium cyanide, amphotericin B, and cycloheximide treated 103Q and 25Q yeast

Stage I and stage II were prepared as described in the experimental procedures, with the exception that stage II cultures were treated with either potassium cyanide<sup>1</sup>, amphotericin B<sup>2</sup>, or cycloheximide<sup>3</sup> at concentrations of 46  $\mu$ M, 38 nM, and 98 nM, respectively. Concentrations of toxins were chosen that inhibited 25Q yeast growth to 30% of the growth of untreated controls. Data was collected and analyzed as described above.

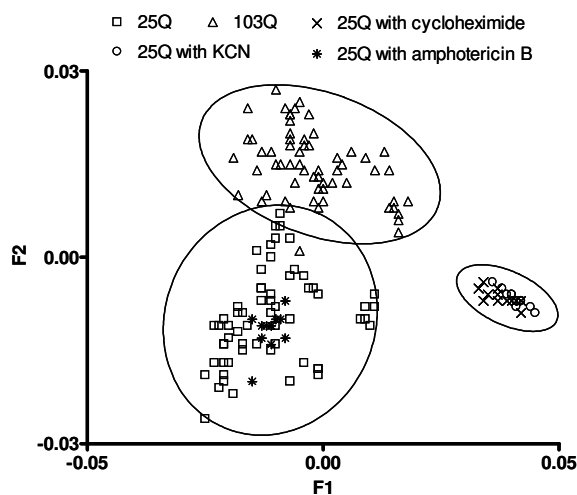

**Supporting Information, Figure 2** Comparison of metabolic changes in response to various toxins. Potassium cyanide (KCN) and cycloheximide treatment cause distinct metabolic changes in 25Q yeast that are different from the changes caused by *mHtt* toxicity.



**Supporting Information, Table 2** Metabolic Profiling Data for Selected Key Metabolites Identified in Studies of Huntington's Disease Model Systems and Humans

|                             | This study         | Nicoli et al. (1993) <sup>4</sup> | Taylor-Robinson et al. (1996) <sup>5</sup> | Reynolds et al. (2005) <sup>6</sup> | Underwood et al. (2006) <sup>7</sup>    | Jenkins et al. (2000) <sup>8</sup> | Jenkins et al. (2005) <sup>9</sup> | Tsang et al. (2006) <sup>10</sup>                | Tkac et al. (2007) <sup>11</sup>  |
|-----------------------------|--------------------|-----------------------------------|--------------------------------------------|-------------------------------------|-----------------------------------------|------------------------------------|------------------------------------|--------------------------------------------------|-----------------------------------|
| Organism                    | yeast              | human <sup>a, b</sup>             | human <sup>c, d</sup>                      | human <sup>d</sup>                  | human <sup>b</sup> , mouse <sup>b</sup> | mouse <sup>c, d, e</sup>           | mouse <sup>c, d</sup>              | mouse <sup>b, c, e, f</sup>                      | mouse <sup>c, d</sup>             |
| Data collection technique   | <sup>1</sup> H NMR | <sup>1</sup> H NMR, HPLC          | <sup>1</sup> H MRS                         | <sup>1</sup> H MRS                  | GC-TOF-MS                               | <sup>1</sup> H-NMR                 | <sup>1</sup> H MRS                 | <sup>1</sup> H NMR, HR-MAS<br><sup>1</sup> H NMR | <i>in vivo</i> <sup>1</sup> H NMR |
| 2-amino- <i>n</i> -butyrate | ND                 | ND                                | ND                                         | ND                                  | significant <sup>g, h</sup>             | ND                                 | ND                                 | ND                                               | ND                                |
| 2-oxoglutarate              | ND                 | ND                                | ND                                         | ND                                  | ND                                      | ND                                 | ND                                 | increase                                         | ND                                |
| 4-aminobutyrate             | ns                 | ns                                | ND                                         | ND                                  | ND                                      | ns                                 | ND                                 | decrease                                         | ns                                |
| acetate                     | decrease           | ns                                | ND                                         | ND                                  | ND                                      | ND                                 | ND                                 | decrease                                         | ND                                |
| adenosine                   | ns                 | ND                                | ND                                         | ND                                  | ND                                      | ND                                 | ND                                 | ND                                               | ND                                |
| alanine                     | decrease           | ns                                | ND                                         | ND                                  | significant <sup>g, h</sup>             | ns                                 | ND                                 | decrease                                         | ND                                |
| arginine                    | ns                 | ND                                | ND                                         | ND                                  | ND                                      | ND                                 | ND                                 | ND                                               | ND                                |
| ascorbate                   | ND                 | ND                                | ND                                         | ND                                  | ND                                      | ND                                 | ND                                 | ND                                               | increase                          |
| asparagine                  | ns                 | ND                                | ND                                         | ND                                  | ND                                      | ND                                 | ND                                 | ND                                               | ND                                |
| aspartate                   | ns                 | ns                                | ND                                         | ND                                  | ND                                      | ns                                 | ND                                 | decrease                                         | ND                                |
| ATP                         | ns                 | ND                                | ND                                         | ND                                  | ND                                      | ND                                 | ND                                 | ND                                               | ND                                |
| choline                     | ND                 | ND                                | ns                                         | ND                                  | ND                                      | increase                           | increase                           | decrease                                         | ND                                |
| citrate                     | ND                 | ns                                | ND                                         | ND                                  | ND                                      | ND                                 | ND                                 | ND                                               | ND                                |
| creatine                    | ND                 | ns                                | ns                                         | decrease                            | ND                                      | ns                                 | ns                                 | increase                                         | increase                          |
| dimethylglycine             | ND                 | ND                                | ND                                         | ND                                  | ND                                      | ND                                 | ND                                 | decrease                                         | ND                                |
| ethylene glycol             | ND                 | ND                                | ND                                         | ND                                  | significant <sup>g, h</sup>             | ND                                 | ND                                 | ND                                               | ND                                |
| formate                     | ns                 | ND                                | ND                                         | ND                                  | ND                                      | ND                                 | ND                                 | ND                                               | ND                                |
| galactitol                  | ns                 | ND                                | ND                                         | ND                                  | ND                                      | ND                                 | ND                                 | ND                                               | ND                                |
| galactose                   | increase           | ND                                | ND                                         | ND                                  | ND                                      | ND                                 | ND                                 | ND                                               | ND                                |
| glucose                     | ND                 | ND                                | ND                                         | ND                                  | significant <sup>g, i</sup>             | increase                           | ND                                 | ND                                               | ns                                |
| glutamate                   | ns                 | ns                                | increase                                   | increase                            | ND                                      | decrease                           | ns                                 | decrease                                         | increase                          |
| glutamine                   | increase           | ns                                | increase                                   | increase                            | ND                                      | increase                           | ns                                 | increase                                         | increase                          |
| glutathione                 | ns                 | ND                                | ND                                         | ND                                  | ND                                      | ND                                 | ND                                 | ND                                               | increase                          |
| glycerol                    | increase           | ND                                | ND                                         | ND                                  | significant <sup>g</sup>                | ND                                 | ND                                 | ND                                               | ND                                |
| glycerophosphocholine       | ND                 | ND                                | ND                                         | ND                                  | ND                                      | ND                                 | ND                                 | increase                                         | increase                          |
| glycine                     | ND                 | increase                          | ND                                         | ND                                  | ND                                      | ns                                 | ND                                 | ns                                               | ND                                |
| histidine                   | decrease           | ND                                | ND                                         | ND                                  | ND                                      | ND                                 | ND                                 | ND                                               | ND                                |
| isoleucine                  | ns                 | ns                                | ND                                         | ND                                  | ND                                      | ND                                 | ND                                 | ND                                               | ND                                |
| lactate                     | ND                 | ns                                | ns                                         | increase                            | significant <sup>g</sup>                | decrease                           | ND                                 | increase                                         | ns                                |
| leucine                     | ns                 | ns                                | ND                                         | ND                                  | ND                                      | ND                                 | ND                                 | ND                                               | ND                                |
| lysine                      | ND                 | ns                                | ND                                         | ND                                  | ND                                      | ND                                 | ND                                 | ND                                               | ND                                |
| malonate                    | ND                 | ND                                | ND                                         | ND                                  | significant <sup>g</sup>                | ND                                 | ND                                 | ND                                               | ND                                |
| methionine                  | ns                 | ND                                | ND                                         | ND                                  | ND                                      | ND                                 | ND                                 | ND                                               | ND                                |

**Supporting Information, Table 2** Metabolic Profiling Data for Selected Key Metabolites Identified in Studies of Huntington's Disease Model Systems and Humans (continued from page 9)

|                             | This study         | Nicoli et al. (1993) <sup>4</sup> | Taylor-Robinson et al. (1996) <sup>5</sup> | Reynolds et al. (2005) <sup>6</sup> | Underwood et al. (2006) <sup>7</sup>    | Jenkins et al. (2000) <sup>8</sup> | Jenkins et al. (2005) <sup>9</sup> | Tsang et al. (2006) <sup>10</sup>                | Tkac et al. (2007) <sup>11</sup>  |
|-----------------------------|--------------------|-----------------------------------|--------------------------------------------|-------------------------------------|-----------------------------------------|------------------------------------|------------------------------------|--------------------------------------------------|-----------------------------------|
| Organism                    | yeast              | human <sup>a, b</sup>             | human <sup>c, d</sup>                      | human <sup>d</sup>                  | human <sup>b</sup> , mouse <sup>b</sup> | mouse <sup>c, d, e</sup>           | mouse <sup>c, d</sup>              | mouse <sup>b, c, e, f</sup>                      | mouse <sup>c, d</sup>             |
| Data collection technique   | <sup>1</sup> H NMR | <sup>1</sup> H NMR, HPLC          | <sup>1</sup> H MRS                         | <sup>1</sup> H MRS                  | GC-TOF-MS                               | <sup>1</sup> H-NMR                 | <sup>1</sup> H MRS                 | <sup>1</sup> H NMR, HR-MAS<br><sup>1</sup> H NMR | <i>in vivo</i> <sup>1</sup> H NMR |
| myo-inositol                | ND                 | ND                                | ND                                         | ns                                  | ND                                      | ns                                 | ND                                 | increase                                         | increase                          |
| N-acetylaspartate           | ND                 | ND                                | ns                                         | decrease                            | ND                                      | decrease                           | decrease                           | decrease                                         | decrease                          |
| N-acetylaspartate glutamate | ND                 | ND                                | ND                                         | ND                                  | ND                                      | ND                                 | ND                                 | increase/ decrease                               | ns                                |
| NAD <sup>+</sup>            | ns                 | ND                                | ND                                         | ND                                  | ND                                      | ND                                 | ND                                 | ND                                               | ND                                |
| phenylalanine               | ns                 | ND                                | ND                                         | ND                                  | ND                                      | ND                                 | ND                                 | ND                                               | ND                                |
| phosphocholine              | ND                 | ND                                | ND                                         | ND                                  | ND                                      | ND                                 | ND                                 | decrease                                         | ns                                |
| phosphocreatine             | ND                 | ND                                | ND                                         | ND                                  | ND                                      | ND                                 | ND                                 | ND                                               | increase                          |
| phosphorylethanolamine      | ND                 | ND                                | ND                                         | ND                                  | ND                                      | ND                                 | ND                                 | ND                                               | decrease                          |
| proline                     | decrease           | ns                                | ND                                         | ND                                  | ND                                      | ND                                 | ND                                 | ND                                               | ND                                |
| propylene glycol            | ns                 | ND                                | ND                                         | ND                                  | ND                                      | ND                                 | ND                                 | ND                                               | ND                                |
| pyroglutamate               | ND                 | ND                                | ND                                         | ND                                  | significant <sup>g, i</sup>             | ND                                 | ND                                 | ND                                               | ND                                |
| pyruvate                    | ND                 | increase                          | ND                                         | ND                                  | ND                                      | ND                                 | ND                                 | ND                                               | ND                                |
| scyllo-inositol             | ND                 | ND                                | ND                                         | ND                                  | ND                                      | increase                           | ND                                 | increase                                         | ND                                |
| spermine                    | ND                 | ND                                | ND                                         | ND                                  | ND                                      | ND                                 | ND                                 | decrease                                         | ND                                |
| succinate                   | decrease           | ND                                | ND                                         | ND                                  | ND                                      | decrease                           | ND                                 | decrease                                         | ND                                |
| taurine                     | ND                 | ND                                | ND                                         | ND                                  | ND                                      | increase                           | increase                           | increase                                         | increase                          |
| threonine                   | increase           | ND                                | ND                                         | ND                                  | ND                                      | ND                                 | ND                                 | ND                                               | ND                                |
| trehalose                   | decrease           | ND                                | ND                                         | ND                                  | ND                                      | ND                                 | ND                                 | ND                                               | ND                                |
| trimethylamine              | ND                 | ND                                | ND                                         | ND                                  | ND                                      | ND                                 | ND                                 | decrease                                         | ND                                |
| trimethylamine N-oxide      | ND                 | ND                                | ND                                         | ND                                  | ND                                      | ND                                 | ND                                 | increase                                         | ND                                |
| tryptophan                  | ns                 | ND                                | ND                                         | ND                                  | ND                                      | ND                                 | ND                                 | ND                                               | ND                                |
| tyrosine                    | ns                 | ND                                | ND                                         | ND                                  | ND                                      | ND                                 | ND                                 | ND                                               | ND                                |
| urea                        | ND                 | ND                                | ND                                         | ND                                  | significant <sup>g</sup>                | ND                                 | ND                                 | ND                                               | ND                                |
| valine                      | increase           | ND                                | ND                                         | ND                                  | significant <sup>g</sup>                | ND                                 | ND                                 | ND                                               | ND                                |
| α-hydroxybutyric acid       | ND                 | ND                                | ND                                         | ND                                  | significant <sup>g, h</sup>             | ND                                 | ND                                 | ND                                               | ND                                |
| α-ketoisocaproate           | ND                 | ND                                | ND                                         | ND                                  | ND                                      | ND                                 | ND                                 | decrease                                         | ND                                |

Abbreviations: ND = Not detected or not reported, ns = not significant, MRS = magnetic resonance spectroscopy, HR-MAS = high-resolution magic angle spinning, HPLC = high performance liquid chromatography. <sup>a</sup> Cerebrospinal fluid. <sup>b</sup> Serum. <sup>c</sup> Results from multiple tissue types summarized in this table. <sup>d</sup> *In vivo* brain. <sup>e</sup> *In vitro* brain. <sup>f</sup> Urine. <sup>g</sup> Direction of change (increase/decrease) not reported. <sup>h</sup> Detected only in human serum.

**Supporting Information, Table 3** Contingency Table of Metabolic Studies of Mutant Huntingtin Toxicity

| <b>Metabolite</b>         | <b>Yeast</b> | <b>Human</b> | <b>Mouse</b> | <b>TOTALS</b> |
|---------------------------|--------------|--------------|--------------|---------------|
| 2-amino-n-butyrate        | 0            | 1            | 0            | 1             |
| 2-oxoglutarate            | 0            | 0            | 1            | 1             |
| 4-aminobutyrate           | 0            | 0            | 1            | 1             |
| acetate                   | 1            | 0            | 1            | 2             |
| alanine                   | 1            | 1            | 1            | 3             |
| ascorbate                 | 0            | 0            | 1            | 1             |
| aspartate                 | 0            | 0            | 1            | 1             |
| choline                   | 0            | 0            | 3            | 3             |
| creatine                  | 0            | 1            | 2            | 3             |
| dimethylglycine           | 0            | 0            | 1            | 1             |
| ethylene glycol           | 0            | 1            | 0            | 1             |
| galactitol                | 1            | 0            | 0            | 1             |
| glucose                   | 0            | 0            | 2            | 2             |
| glutamate                 | 0            | 2            | 3            | 5             |
| glutamine                 | 1            | 2            | 3            | 6             |
| glutathione               | 0            | 0            | 1            | 1             |
| glycerol                  | 1            | 1            | 1            | 3             |
| glycerophosphocholine     | 0            | 0            | 2            | 2             |
| glycine                   | 0            | 1            | 0            | 1             |
| histidine                 | 1            | 0            | 0            | 1             |
| lactate                   | 0            | 2            | 3            | 5             |
| malonate                  | 0            | 1            | 1            | 2             |
| myo-inositol              | 0            | 0            | 2            | 2             |
| N-acetylaspartate         | 0            | 1            | 4            | 5             |
| phosphocholine            | 0            | 0            | 1            | 1             |
| phosphocreatine           | 0            | 0            | 1            | 1             |
| phosphorylethanolamine    | 0            | 0            | 1            | 1             |
| proline                   | 1            | 0            | 0            | 1             |
| pyroglutamate             | 0            | 0            | 1            | 1             |
| pyruvate                  | 0            | 1            | 0            | 1             |
| scyllo-inositol           | 0            | 0            | 2            | 2             |
| spermine                  | 0            | 0            | 1            | 1             |
| succinate                 | 1            | 0            | 2            | 3             |
| taurine                   | 0            | 0            | 4            | 4             |
| threonine                 | 1            | 0            | 0            | 1             |
| trehalose                 | 1            | 0            | 0            | 1             |
| trimethylamine            | 0            | 0            | 1            | 1             |
| trimethylamine N-oxide    | 0            | 0            | 1            | 1             |
| urea                      | 0            | 1            | 1            | 2             |
| valine                    | 1            | 1            | 1            | 3             |
| alpha-hydroxybutyric acid | 0            | 1            | 0            | 1             |
| alpha-ketoisocaproate     | 0            | 0            | 1            | 1             |
| <b>TOTALS</b>             | <b>11</b>    | <b>18</b>    | <b>52</b>    | <b>81</b>     |

## REFERENCES

1. Way, J. L. Cyanide intoxication and its mechanism of antagonism. *Annu. Rev. Pharmacol. Toxicol.* **1984**, *24*, 451-481.
2. Palacios, D. S.; Anderson, T. M.; Burke, M. D. A post-PKS oxidation of the amphotericin B skeleton predicted to be critical for channel formation is not required for potent antifungal activity. *J. Am. Chem. Soc.* **2007**, *129* (45), 13804-13805.
3. Obrig, T. G.; Culp, W. J.; McKeehan, W. L.; Hardesty, B. The mechanism by which cycloheximide and related glutarimide antibiotics inhibit peptide synthesis on reticulocyte ribosomes. *J. Biol. Chem.* **1971**, *246* (1), 174-181.
4. Nicoli, F.; Vion-Dury, J.; Maloteaux, J. M.; Delwaide, C.; Confort-Gouny, S.; Sciaky, M.; Cozzone, P. J. CSF and serum metabolic profile of patients with Huntington's chorea: a study by high resolution proton NMR spectroscopy and HPLC. *Neurosci. Lett.* **1993**, *154* (1-2), 47-51.
5. Taylor-Robinson, S. D.; Weeks, R. A.; Bryant, D. J.; Sargentoni, J.; Marcus, C. D.; Harding, A. E.; Brooks, D. J. Proton magnetic resonance spectroscopy in Huntington's disease: evidence in favour of the glutamate excitotoxic theory. *Mov. Disord.* **1996**, *11* (2), 167-173.
6. Reynolds, N. C.; Prost, R. W.; Mark, L. P., Heterogeneity in <sup>1</sup>H-MRS profiles of presymptomatic and early manifest Huntington's disease. *Brain Res.* **2005**, *1031* (1), 82-89.
7. Underwood, B. R.; Broadhurst, D.; Dunn, W. B.; Ellis, D. I.; Michell, A. W.; Vacher, C.; Mosedale, D. E.; Kell, D. B.; Barker, R. A.; Grainger, D. J.; Rubinsztein, D. C. Huntington disease patients and transgenic mice have similar pro-catabolic serum metabolite profiles. *Brain* **2006**, *129* (4), 877-886.
8. Jenkins, B. G.; Klivenyi, P.; Kustermann, E.; Andreassen, O. A.; Ferrante, R. J.; Rosen, B. R.; Beal, M. F. Nonlinear decrease over time in *N*-acetyl aspartate levels in the absence of neuronal loss and increases in glutamine and glucose in transgenic Huntington's disease mice. *J. Neurochem.* **2000**, *74* (5), 2108-2119.
9. Jenkins, B. G.; Andreassen, O. A.; Dedeoglu, A.; Leavitt, B.; Hayden, M.; Borchelt, D.; Ross, C. A.; Ferrante, R. J.; Beal, M. F. Effects of CAG repeat length, HTT protein length and protein context on cerebral metabolism measured using magnetic resonance spectroscopy in transgenic mouse models of Huntington's disease. *J. Neurochem.* **2005**, *95* (2), 553-562.
10. Tsang, T. M.; Woodman, B.; McLoughlin, G. A.; Griffin, J. L.; Tabrizi, S. J.; Bates, G. P.; Holmes, E. Metabolic characterization of the R6/2 transgenic mouse model of Huntington's disease by high-resolution MAS <sup>1</sup>H NMR spectroscopy. *J. Proteome Res.* **2006**, *5* (3), 483-492.
11. Tkac, I.; Dubinsky, J. M.; Keene, C. D.; Gruetter, R.; Low, W. C. Neurochemical changes in Huntington R6/2 mouse striatum detected by in vivo <sup>1</sup>H NMR spectroscopy. *J. Neurochem.* **2007**, *100* (5), 1397-1406.
